# Supplementary material
Source: Springer Nature journal article supplement (https://www.springermedizin.de/resource/supplementary/12933_2009_179_MOESM2_ESM.pdf/9539766)

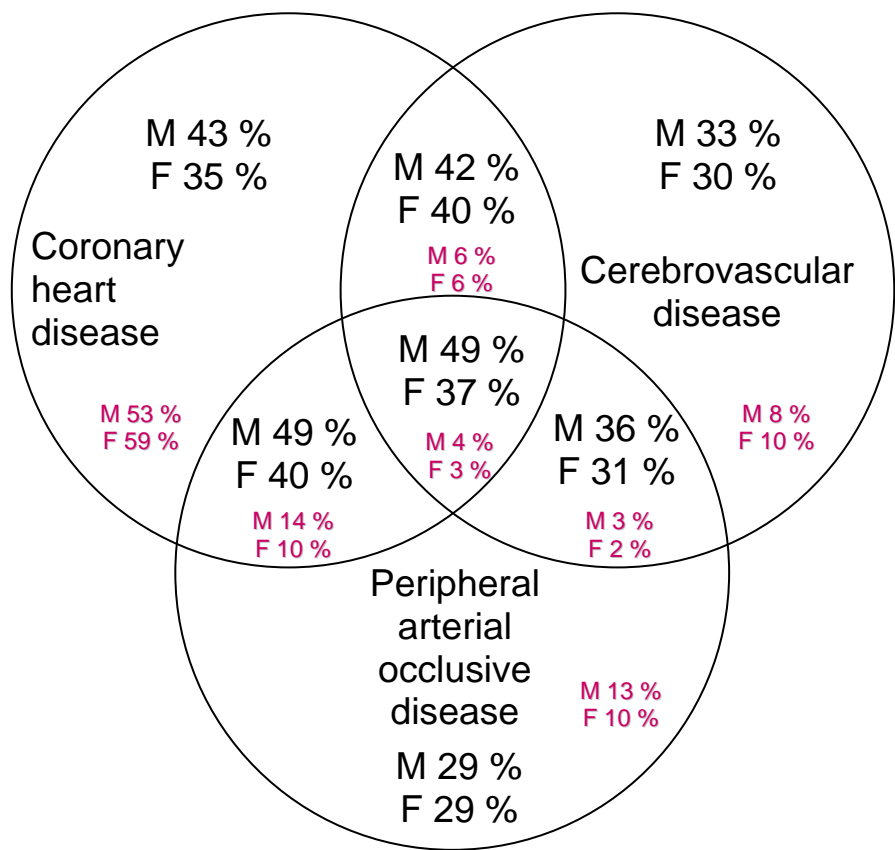

Supplement: MOESM2 [file 9539766]
